# Supplementary material for: Aqueous solvation of the chloride ion revisited with density functional theory: impact of correlation and exchange approximations
Source: Royal Society of Chemistry journal article supplement (doi:10.1039/c9cp06821j), 2020-01-01
Supplement: c9cp06821j1.pdf [file c9cp06821j1.pdf]

# Aqueous Solvation of the Chloride Ion Revisited with Density Functional Theory: Impact of Correlation and Exchange Approximations

Mark DelloStritto, Jianhang Xu, Michael Klein, and Xifan Wu

Below we have plotted some relevant structural and dynamic measures of the  $\text{H}_2\text{O}$  molecules in the ab-initio molecular dynamics simulations of  $\text{Cl}^--(\text{H}_2\text{O})_{63}$ . This includes the O-O and O-H radial distribution functions, the O-O-O angular distribution function (ADF), and the vibrational density of states of the H atoms.

H-bonds are defined between  $\text{H}_2\text{O}$  molecules and  $\text{Cl}^-$  using the Cl-O RDF shown in the main manuscript and the Cl-O-H ADF shown in Figure 4. The cutoffs for the Cl-O and Cl-H distances when computing the ADF are chosen such that only the nearest neighbors are included. A similar procedure is followed when computing the O-O-H ADF shown in Figure 3, such that only the nearest neighbors are included. Figure 3 thus shows the distributions of O-O-H angles used to determine the existence of a H-bond, where one sees a sharp peak small angles associated with H-bonded  $\text{H}_2\text{O}$  molecules. Note that the Cl-O-H ADF in Figure 4 has a very similar shape to the O-O-H ADF in Figure 3, and both show a sharp peak at small angles which goes to zero at roughly  $30^\circ$ . H-bonds between  $\text{H}_2\text{O}$  and  $\text{Cl}^-$  are therefore defined by a O-Cl distance less than  $3.80 \text{ \AA}$  and a Cl-O-H angle less than  $30^\circ$ .

Note of the infrared adsorption coefficient of  $\text{H}_2\text{O}$   $\alpha(\omega)$  in Figure 5. We don't see the same behavior in  $\alpha(\omega)$  for  $\text{H}_2\text{O}$  as for  $\text{Cl}^-$ , as the intensity of the spectrum does not on the functional as strongly as the  $\text{Cl}^-$  anion.

## References

- [1] F. J. Harris. On the use of windows for harmonic analysis with the discrete Fourier transform. *Proceedings of the IEEE*, 66(1):51–83, January 1978.

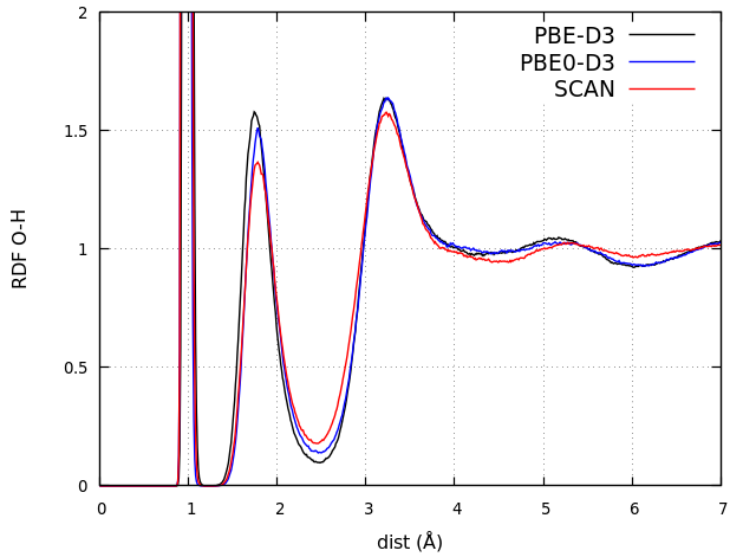

Figure 1: The O-H radial distribution function for each simulation.

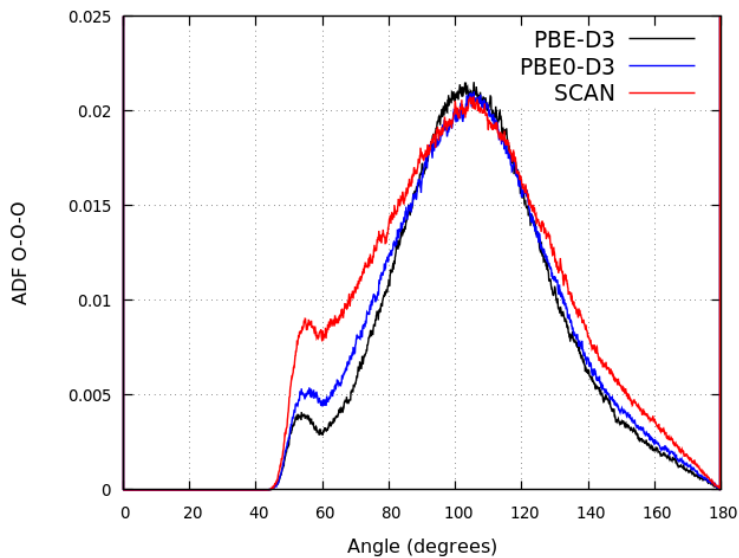

Figure 2: The O-O-O angular distribution function for each simulation for all O atoms within the first minimum of the O-O RDF (3.35 Å).

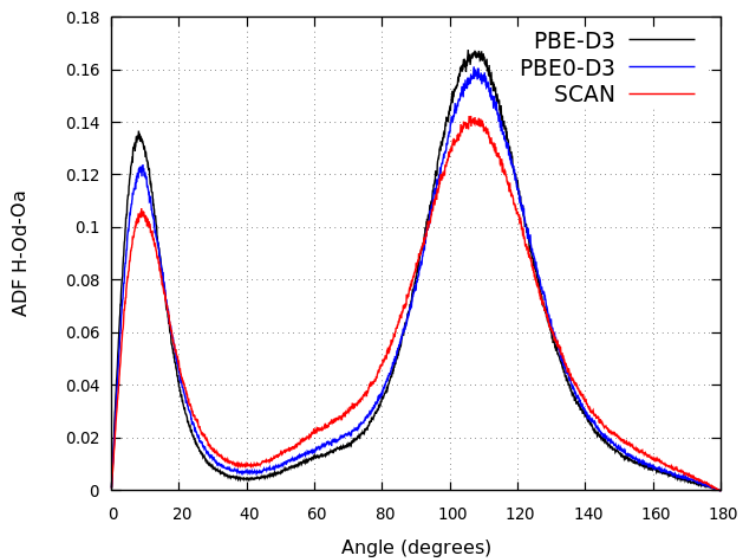

Figure 3: The O-O-H angular distribution function for each simulation, where we use a cutoff of 3.35 Å for the O-O distance and a cutoff of 1.2 Å for the O-H distance.

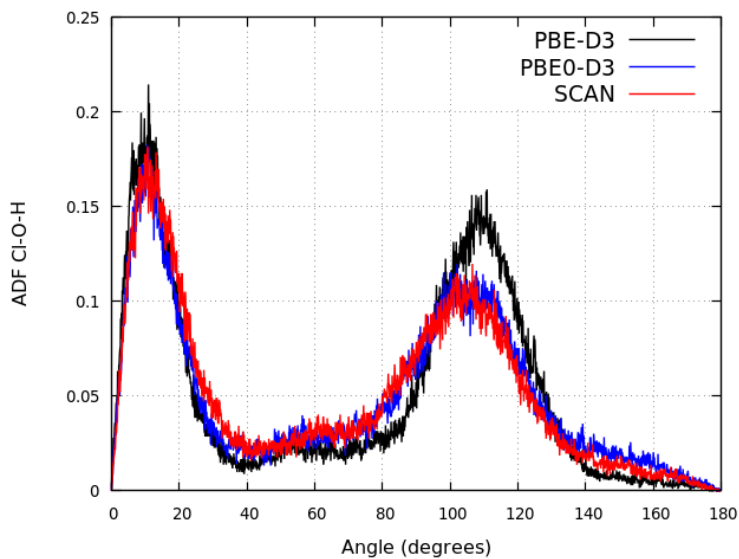

Figure 4: The Cl-O-H angular distribution function for each simulation, where we use a cutoff of 3.75 Å for the O-Cl distance and a cutoff of 1.2 Å for the O-H distance.

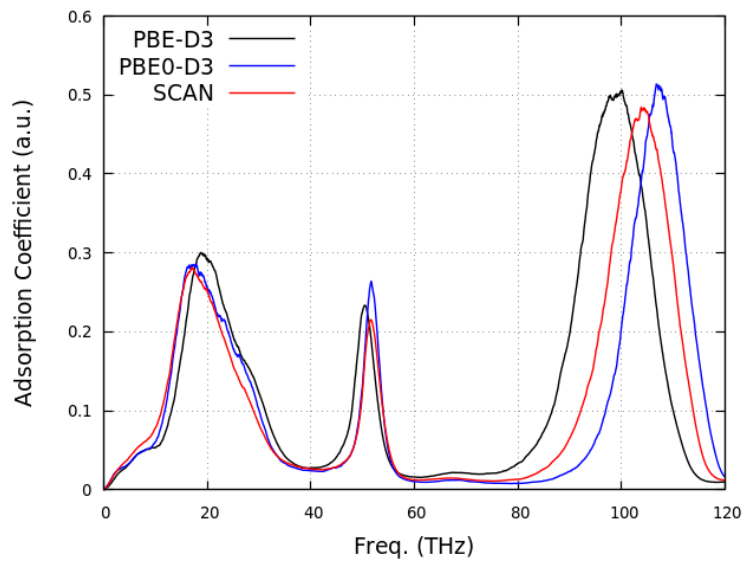

Figure 5: The infrared adsorption coefficient per unit length computed from the dipole moment of the  $\text{H}_2\text{O}$  molecules. The spectrum has been windowed using the Blackmann-Harris function[1] and smoothed with a Gaussian with a width of 75.0 fs.
